# Supplementary material for: An agile benchmarking framework for wastewater resource recovery technologies
Source: Research Square preprint supplement (doi:10.21203/rs.3.rs-7874013/v1), 2025-10-23
Supplement: Supplementary file 1 [file 5f969338ae2e23ebbbf9700e.pdf]

# **Supporting Information for**

## **An agile benchmarking framework for wastewater resource recovery technologies**

Xinyi Zhang<sup>1\*</sup>, Saumitra Rai<sup>1</sup>, Zixuan Wang<sup>1</sup>, Yalin Li<sup>2\*</sup>, Jeremy S. Guest<sup>1,3\*</sup>

<sup>1</sup> The Grainger College of Engineering, Department of Civil and Environmental Engineering, University of Illinois Urbana-Champaign, 3221 Newmark Civil Engineering Laboratory, Urbana, Illinois, United States of America

<sup>2</sup> Department of Civil and Environmental Engineering, Rutgers, The State University of New Jersey, Piscataway, New Jersey, United States of America

<sup>3</sup> Institute for Sustainability, Energy, and Environment, University of Illinois Urbana-Champaign, Urbana, Illinois, United States of America

\*Corresponding authors: [xinyiz6@illinois.edu](mailto:xinyiz6@illinois.edu) (XZ); [yalin.li@rutgers.edu](mailto:yalin.li@rutgers.edu) (YL); [jsquest@illinois.edu](mailto:jsquest@illinois.edu) (JSG)

**Table S1. Characteristics of different influent wastewater and fractionation assumptions.** Low-strength, medium-strength, and high-strength wastewaters are alternatives based on [1].

| Unit                    |                            | Raw wastewater |              |                 |               |
|-------------------------|----------------------------|----------------|--------------|-----------------|---------------|
|                         |                            | Default        | Low strength | Medium strength | High strength |
| Composite variables     |                            |                |              |                 |               |
| Q                       | MGD                        | 10.0           | 10.0         | 10.0            | 10.0          |
| COD                     | mg·L <sup>-1</sup>         | 358.0          | 339.0        | 508.0           | 1016          |
| BOD                     | mg·L <sup>-1</sup>         | 172.1          | 136.4        | 204.3           | 408.7         |
| TSS                     | mg·L <sup>-1</sup>         | 165.4          | 135.6        | 203.2           | 406.5         |
| TN                      | mg·L <sup>-1</sup>         | 40.0           | 23.9         | 34.9            | 70.7          |
| TP                      | mg·L <sup>-1</sup>         | 7.0            | 3.7          | 5.6             | 11.0          |
| State variables         |                            |                |              |                 |               |
| $S_{NH_4}$              | mg-N·L <sup>-1</sup>       | 25.9           | 14.0         | 20.0            | 41.0          |
| $S_{PO_4}$              | mg-P·L <sup>-1</sup>       | 5.0            | 1.6          | 2.4             | 4.7           |
| $S_F$                   | mg-COD·L <sup>-1</sup>     | 111.0          | 81.4         | 121.9           | 243.8         |
| $S_A$                   | mg-COD·L <sup>-1</sup>     | 8.6            | 17.0         | 25.4            | 50.8          |
| $S_I$                   | mg-COD·L <sup>-1</sup>     | 17.9           | 25.4         | 38.1            | 76.2          |
| $S_{IC}$                | mg-C·L <sup>-1</sup>       | 84.0           | 84.0         | 84.0            | 84.0          |
| $S_K$                   | mg·L <sup>-1</sup>         | 28.0           | 11.0         | 16.0            | 32.0          |
| $S_{Mg}$                | mg·L <sup>-1</sup>         | 50.0           | 50.0         | 50.0            | 50.0          |
| $X_I$                   | mg-COD·L <sup>-1</sup>     | 71.6           | 101.7        | 152.4           | 304.8         |
| $X_S$                   | mg-COD·L <sup>-1</sup>     | 148.9          | 113.6        | 170.2           | 340.4         |
| $S_{Ca}$                | mg·L <sup>-1</sup>         | 140.0          | 140.0        | 140.0           | 140.0         |
| $S_{Na}$                | mg·L <sup>-1</sup>         | 87.0           | 87.0         | 87.0            | 87.0          |
| $S_{Cl}$                | mg·L <sup>-1</sup>         | 425.0          | 39.0         | 59.0            | 118.0         |
| COD fractionation       |                            |                |              |                 |               |
| $S_F$                   | -                          | 0.31           | 0.24         | 0.24            | 0.24          |
| $S_A$                   | -                          | 0.024          | 0.05         | 0.05            | 0.05          |
| $S_I$                   | -                          | 0.05           | 0.075        | 0.075           | 0.075         |
| $X_S$                   | -                          | 0.416          | 0.335        | 0.335           | 0.335         |
| $X_I$                   | -                          | 0.2            | 0.3          | 0.3             | 0.3           |
| Nitrogen content        |                            |                |              |                 |               |
| $S_F, X_S$              | g N·g <sup>-1</sup> COD    | 0.03352        | 0.023464     | 0.023464        | 0.023464      |
| $S_I, X_I$              | g N·g <sup>-1</sup> COD    | 0.06003        | 0.042021     | 0.042021        | 0.042021      |
| $X_H, X_{PAO}, X_{AUT}$ | g N·g <sup>-1</sup> COD    | 0.08615        | 0.060305     | 0.060305        | 0.060305      |
| Phosphorus content      |                            |                |              |                 |               |
| $S_F, X_S$              | g P·g <sup>-1</sup> COD    | 0.00559        | 0.006149     | 0.006149        | 0.006149      |
| $S_I, X_I$              | g P·g <sup>-1</sup> COD    | 0.00649        | 0.007139     | 0.007139        | 0.007139      |
| $X_H, X_{PAO}, X_{AUT}$ | g P·g <sup>-1</sup> COD    | 0.02154        | 0.002369     | 0.002369        | 0.002369      |
| COD-to-mass ratio       |                            |                |              |                 |               |
| $X_S, X_I$              | g mass·g <sup>-1</sup> COD | 0.75           | 0.63         | 0.63            | 0.63          |

**Table S2. Default parameter values in *MetalDosage* model.**

| Symbol    | Description                                          | Value |       | Unit                            |
|-----------|------------------------------------------------------|-------|-------|---------------------------------|
|           |                                                      | $S_F$ | $S_I$ |                                 |
| $F_{min}$ | Minimum metal consumption per unit soluble component | 4     | 4     | g Me·g <sup>-1</sup> COD        |
| $F_{max}$ | Maximum metal consumption per unit soluble component | 20    | 20    | g Me·g <sup>-1</sup> COD        |
| $k_a$     | Affinity factor for coagulation                      | 0.5   | 0.5   | m <sup>3</sup> ·g <sup>-1</sup> |
| $f_{col}$ | Colloidal fraction of soluble component <sup>†</sup> | 0.48  | -     | -                               |

<sup>†</sup> Only a fraction of soluble organic substrate ( $S_F$ ) is assumed to be colloidal and removable by coagulation/flocculation. The default colloidal fraction is consistent with the assumptions on raw wastewater composition in [2].

**Table S3. *mASM2d* model state variables and default properties in QSDsan**, including the way in which each component is measured in the model (“Measured As”), the elemental contents (i.e., C, N, P, COD), and  $i_{mass}$  relevant for the estimation of TSS. All default elemental compositions are consistent with assumptions in [3].

|                       | Description                                                                        | Measured As                                     | $i_{COD}$ | $i_C$ | $i_N$   | $i_P$   | $i_{mass}$ |
|-----------------------|------------------------------------------------------------------------------------|-------------------------------------------------|-----------|-------|---------|---------|------------|
| g·(g “measured-as”)⁻¹ |                                                                                    |                                                 |           |       |         |         |            |
| $S_{O_2}$             | Dissolved oxygen gas                                                               | O <sub>2</sub>                                  | -1        | 0     | 0       | 0       | 1          |
| $S_{N_2}$             | Dissolved nitrogen gas                                                             | N <sub>2</sub>                                  | -1.71     | 0     | 1       | 0       | 1          |
| $S_{NH_4}$            | Ammonium                                                                           | N                                               | 0         | 0     | 1       | 0       | 1.288      |
| $S_{NO_3}$            | Nitrate                                                                            | N                                               | -4.57     | 0     | 1       | 0       | 4.427      |
| $S_{PO_4}$            | Orthophosphate                                                                     | P                                               | 0         | 0     | 0       | 1       | 3.099      |
| $S_F$                 | Fermentable substrate                                                              | COD                                             | 1         | 0.318 | 0.03352 | 0.00559 | 0.75       |
| $S_A$                 | Acetate                                                                            | COD                                             | 1         | 0.375 | 0       | 0       | 0.923      |
| $S_I$                 | Soluble inert organic materials                                                    | COD                                             | 1         | 0.362 | 0.06003 | 0.00649 | 0.75       |
| $S_{IC}$              | Total inorganic C in forms of HCO <sub>3</sub> <sup>-</sup>                        | C                                               | 0         | 1     | 0       | 0       | 5.080      |
| $S_K$                 | Potassium                                                                          | K                                               | 0         | 0     | 0       | 0       | 1          |
| $S_{Mg}$              | Magnesium                                                                          | Mg                                              | 0         | 0     | 0       | 0       | 1          |
| $X_I$                 | Particulate inert organic materials                                                | COD                                             | 1         | 0.362 | 0.06003 | 0.00649 | 0.75       |
| $X_S$                 | Slowly biodegradable substrate                                                     | COD                                             | 1         | 0.318 | 0.03352 | 0.00559 | 0.75       |
| $X_H$                 | Heterotrophic biomass                                                              | COD                                             | 1         | 0.366 | 0.08615 | 0.02154 | 0.9        |
| $X_{PAO}$             | Phosphorus-accumulating organisms                                                  | COD                                             | 1         | 0.366 | 0.08615 | 0.02154 | 0.9        |
| $X_{PP}$              | Polyphosphate (K <sub>0.33</sub> Mg <sub>0.33</sub> PO <sub>3</sub> ) <sub>n</sub> | P                                               | 0         | 0     | 0       | 1       | 3.225      |
| $X_{PHA}$             | Poly-β-hydroxyalkanoates                                                           | COD                                             | 1         | 0.3   | 0       | 0       | 0.55       |
| $X_{AUT}$             | Autotrophic biomass                                                                | COD                                             | 1         | 0.366 | 0.08615 | 0.02154 | 0.9        |
| $S_{Ca}$              | Calcium                                                                            | Ca                                              | 0         | 0     | 0       | 0       | 1          |
| $X_{CaCO_3}$          | Calcite                                                                            | CaCO <sub>3</sub>                               | 0         | 0.120 | 0       | 0       | 1          |
| $X_{struv}$           | Struvite                                                                           | NH <sub>4</sub> MgPO <sub>4</sub>               | 0         | 0     | 0.05708 | 0.12621 | 1          |
| $X_{newb}$            | Newberyite                                                                         | MgHPO <sub>4</sub>                              | 0         | 0     | 0       | 0.17767 | 1          |
| $X_{ACP}$             | Amorphous calcium phosphate                                                        | Ca <sub>3</sub> (PO <sub>4</sub> ) <sub>2</sub> | 0         | 0     | 0       | 0.19972 | 1          |
| $X_{MgCO_3}$          | Magnesite                                                                          | MgCO <sub>3</sub>                               | 0         | 0.142 | 0       | 0       | 1          |
| $X_{AlOH}$            | Aluminum hydroxide                                                                 | Al(OH) <sub>3</sub>                             | 0         | 0     | 0       | 0       | 1          |
| $X_{AlPO_4}$          | Aluminum phosphate                                                                 | AlPO <sub>4</sub>                               | 0         | 0     | 0       | 0.25398 | 1          |
| $X_{FeOH}$            | Iron hydroxide                                                                     | Fe(OH) <sub>3</sub>                             | 0         | 0     | 0       | 0       | 1          |
| $X_{FePO_4}$          | Iron phosphate                                                                     | FePO <sub>4</sub>                               | 0         | 0     | 0       | 0.20537 | 1          |
| $S_{Na}$              | Sodium, proxy for cations                                                          | Na                                              | 0         | 0     | 0       | 0       | 1          |
| $S_{Cl}$              | Chloride, proxy for anions                                                         | Cl                                              | 0         | 0     | 0       | 0       | 1          |

**Table S4. Kinetic rate expressions in *mASM2d*, based on modifications by [3].**

| Process                               | Kinetic rate expression                                                                                                                                                                                                                                                                                                                                |
|---------------------------------------|--------------------------------------------------------------------------------------------------------------------------------------------------------------------------------------------------------------------------------------------------------------------------------------------------------------------------------------------------------|
| Aerobic hydrolysis                    | $K_h \cdot \frac{S_{O_2}}{K_{O_2} + S_{O_2}} \cdot \frac{\frac{X_S}{X_H}}{K_X + \frac{X_S}{X_H}} \cdot X_H$                                                                                                                                                                                                                                            |
| Anoxic hydrolysis                     | $K_h \cdot \eta_{NO_3} \cdot \frac{K_{O_2}}{K_{O_2} + S_{O_2}} \cdot \frac{S_{NO_3}}{K_{NO_3} + S_{NO_3}} \cdot \frac{\frac{X_S}{X_H}}{K_X + \frac{X_S}{X_H}} \cdot X_H$                                                                                                                                                                               |
| Anaerobic hydrolysis                  | $K_h \cdot \eta_{fe} \cdot \frac{K_{O_2}}{K_{O_2} + S_{O_2}} \cdot \frac{K_{NO_3}}{K_{NO_3} + S_{NO_3}} \cdot \frac{\frac{X_S}{X_H}}{K_X + \frac{X_S}{X_H}} \cdot X_H$                                                                                                                                                                                 |
| $X_H$ aerobic growth on $S_F$         | $\mu_H \cdot \frac{S_{O_2}}{K_{O_2,H} + S_{O_2}} \cdot \frac{S_F}{K_F + S_F} \cdot \frac{S_F}{S_F + S_A} \cdot \frac{S_{NH_4}}{K_{NH_4,H} + S_{NH_4}} \cdot \frac{S_{PO_4}}{K_{P,H} + S_{PO_4}} \cdot X_H$                                                                                                                                             |
| $X_H$ aerobic growth on $S_A$         | $\mu_H \cdot \frac{S_{O_2}}{K_{O_2,H} + S_{O_2}} \cdot \frac{S_A}{K_{A,H} + S_A} \cdot \frac{S_A}{S_F + S_A} \cdot \frac{S_{NH_4}}{K_{NH_4,H} + S_{NH_4}} \cdot \frac{S_{PO_4}}{K_{P,H} + S_{PO_4}} \cdot X_H$                                                                                                                                         |
| Denitrification with $S_F$            | $\mu_H \cdot \eta_{NO_3,H} \cdot \frac{K_{O_2,H}}{K_{O_2,H} + S_{O_2}} \cdot \frac{S_{NO_3}}{K_{NO_3,H} + S_{NO_3}} \cdot \frac{S_F}{K_F + S_F} \cdot \frac{S_F}{S_F + S_A} \cdot \frac{S_{NH_4}}{K_{NH_4,H} + S_{NH_4}} \cdot \frac{S_{PO_4}}{K_{P,H} + S_{PO_4}} \cdot X_H$                                                                          |
| Denitrification with $S_A$            | $\mu_H \cdot \eta_{NO_3,H} \cdot \frac{K_{O_2,H}}{K_{O_2,H} + S_{O_2}} \cdot \frac{S_{NO_3}}{K_{NO_3,H} + S_{NO_3}} \cdot \frac{S_A}{K_{A,H} + S_A} \cdot \frac{S_A}{S_F + S_A} \cdot \frac{S_{NH_4}}{K_{NH_4,H} + S_{NH_4}} \cdot \frac{S_{PO_4}}{K_{P,H} + S_{PO_4}} \cdot X_H$                                                                      |
| Fermentation                          | $q_{fe} \cdot \frac{K_{O_2,H}}{K_{O_2,H} + S_{O_2}} \cdot \frac{K_{NO_3}}{K_{NO_3} + S_{NO_3}} \cdot \frac{S_F}{K_{fe} + S_F} \cdot X_H$                                                                                                                                                                                                               |
| Lysis of $X_H$                        | $b_H \cdot \left( \frac{S_{O_2}}{K_{O_2,H} + S_{O_2}} + \eta_{NO_3,H,l} \cdot \frac{K_{O_2,H}}{K_{O_2,H} + S_{O_2}} \cdot \frac{S_{NO_3}}{K_{NO_3,H} + S_{NO_3}} \right) \cdot X_H$                                                                                                                                                                    |
| Storage of $X_{PHA}$                  | $q_{PHA} \cdot \frac{S_A}{K_{A,PAO} + S_A} \cdot \frac{\frac{X_{PP}}{X_{PAO}}}{K_{PP} + \frac{X_{PP}}{X_{PAO}}} \cdot X_{PAO}$                                                                                                                                                                                                                         |
| Aerobic storage of $X_{PP}$           | $q_{PP} \cdot \frac{S_{O_2}}{K_{O_2,PAO} + S_{O_2}} \cdot \frac{S_{PO_4}}{K_{PS} + S_{PO_4}} \cdot \frac{\frac{X_{PHA}}{X_{PAO}}}{K_{PHA} + \frac{X_{PHA}}{X_{PAO}}} \cdot \frac{K_{MAX} - \frac{X_{PP}}{X_{PAO}}}{K_{IPP} + K_{MAX} - \frac{X_{PP}}{X_{PAO}}} \cdot X_{PAO}$                                                                          |
| Anoxic storage of $X_{PP}$            | $q_{PP} \cdot \eta_{NO_3,PAO} \cdot \frac{K_{O_2,PAO}}{K_{O_2,PAO} + S_{O_2}} \cdot \frac{S_{NO_3}}{K_{NO_3,PAO} + S_{NO_3}} \cdot \frac{S_{PO_4}}{K_{PS} + S_{PO_4}} \cdot \frac{\frac{X_{PHA}}{X_{PAO}}}{K_{PHA} + \frac{X_{PHA}}{X_{PAO}}} \cdot \frac{K_{MAX} - \frac{X_{PP}}{X_{PAO}}}{K_{IPP} + K_{MAX} - \frac{X_{PP}}{X_{PAO}}} \cdot X_{PAO}$ |
| $X_{PAO}$ aerobic growth on $X_{PHA}$ | $\mu_{PAO} \cdot \frac{S_{O_2}}{K_{O_2,PAO} + S_{O_2}} \cdot \frac{S_{NH_4}}{K_{NH_4,PAO} + S_{NH_4}} \cdot \frac{S_{PO_4}}{K_{P,PAO} + S_{PO_4}} \cdot \frac{\frac{X_{PHA}}{X_{PAO}}}{K_{PHA} + \frac{X_{PHA}}{X_{PAO}}} \cdot X_{PAO}$                                                                                                               |
| $X_{PAO}$ anoxic growth on $X_{PHA}$  | $\mu_{PAO} \cdot \eta_{NO_3,PAO} \cdot \frac{K_{O_2,PAO}}{K_{O_2,PAO} + S_{O_2}} \cdot \frac{S_{NO_3}}{K_{NO_3,PAO} + S_{NO_3}} \cdot \frac{S_{NH_4}}{K_{NH_4,PAO} + S_{NH_4}} \cdot \frac{S_{PO_4}}{K_{P,PAO} + S_{PO_4}} \cdot \frac{\frac{X_{PHA}}{X_{PAO}}}{K_{PHA} + \frac{X_{PHA}}{X_{PAO}}} \cdot X_{PAO}$                                      |
| Lysis of $X_{PAO}$                    | $b_{PAO} \cdot \left( \frac{S_{O_2}}{K_{O_2,PAO} + S_{O_2}} + \eta_{NO_3,PAO,l} \cdot \frac{K_{O_2,PAO}}{K_{O_2,PAO} + S_{O_2}} \cdot \frac{S_{NO_3}}{K_{NO_3,PAO} + S_{NO_3}} \right) \cdot X_{PAO}$                                                                                                                                                  |
| Lysis of $X_{PP}$                     | $b_{PP} \cdot \left( \frac{S_{O_2}}{K_{O_2,PAO} + S_{O_2}} + \eta_{NO_3,PP,l} \cdot \frac{K_{O_2,PAO}}{K_{O_2,PAO} + S_{O_2}} \cdot \frac{S_{NO_3}}{K_{NO_3,PAO} + S_{NO_3}} \right) \cdot X_{PP}$                                                                                                                                                     |
| Lysis of $X_{PHA}$                    | $b_{PHA} \cdot \left( \frac{S_{O_2}}{K_{O_2,PAO} + S_{O_2}} + \eta_{NO_3,PHA,l} \cdot \frac{K_{O_2,PAO}}{K_{O_2,PAO} + S_{O_2}} \cdot \frac{S_{NO_3}}{K_{NO_3,PAO} + S_{NO_3}} \right) \cdot X_{PHA}$                                                                                                                                                  |

**Table S4 (cont.). Kinetic rate expressions in *mASM2d*, based on modifications by [3].**

| Process                                    | Kinetic rate expression                                                                                                                                                                               |
|--------------------------------------------|-------------------------------------------------------------------------------------------------------------------------------------------------------------------------------------------------------|
| Aerobic growth of $X_{AUT}$                | $\mu_{AUT} \cdot \frac{S_{O_2}}{K_{O_2,AUT} + S_{O_2}} \cdot \frac{S_{NH_4}}{K_{NH_4,AUT} + S_{NH_4}} \cdot \frac{S_{PO_4}}{K_{P,AUT} + S_{PO_4}} \cdot X_{AUT}$                                      |
| Lysis of $X_{AUT}$                         | $b_{AUT} \cdot \left( \frac{S_{O_2}}{K_{O_2,AUT} + S_{O_2}} + \eta_{NO_3,AUT,l} \cdot \frac{K_{O_2,AUT}}{K_{O_2,AUT} + S_{O_2}} \cdot \frac{S_{NO_3}}{K_{NO_3,AUT} + S_{NO_3}} \right) \cdot X_{AUT}$ |
| $X_{AlPO_4}$ precipitation & redissolution | $k_{PRE,Al} \cdot S_{PO_4} \cdot X_{AlOH} - k_{RED} \cdot X_{AlPO_4} \cdot I_{alk}$                                                                                                                   |
| $X_{FePO_4}$ precipitation & redissolution | $k_{PRE,Fe} \cdot S_{PO_4} \cdot X_{FeOH} - k_{RED} \cdot X_{FePO_4} \cdot I_{alk}$                                                                                                                   |

$$I_{alk} = \frac{S_{ALK}}{S_{ALK} + K_{ALK,PRE}}, S_{ALK} = [CO_3^{2-}] \times 2 + [HCO_3^-]$$

Relative abundances of carbonic species ( $H_2CO_3$ ,  $HCO_3^-$ ,  $CO_3^{2-}$ ) are determined by pH, which by default is assumed to be constant at 7. pH can also be user-specified or estimated at each time step as a function of wastewater composition.

**Table S5. New kinetic parameters in *mASM2d*.** All default values below are taken from [3]. Typical values at 20°C for kinetic parameters in the original ASM2d [4] are taken as default values in *mASM2d*.

| Symbol              | Description                                                    | Default value | Unit                                                                 |
|---------------------|----------------------------------------------------------------|---------------|----------------------------------------------------------------------|
| $\eta_{NO_3,H,l}$   | Reduction factor for anoxic lysis of heterotrophs              | 0.5           | -                                                                    |
| $\eta_{NO_3,PAO,l}$ | Reduction factor for anoxic lysis of PAO                       | 0.33          | -                                                                    |
| $\eta_{NO_3,PP,l}$  | Reduction factor for anoxic lysis of PP                        | 0.33          | -                                                                    |
| $\eta_{NO_3,PHA,l}$ | Reduction factor for anoxic lysis of PHA                       | 0.33          | -                                                                    |
| $\eta_{NO_3,AUT,l}$ | Reduction factor for anoxic lysis of autotrophs                | 0.33          | -                                                                    |
| $K_{NO_3,AUT}$      | Half saturation coefficient for $S_{NO_3}$ for autotroph lysis | 0.5           | mg N·L <sup>-1</sup>                                                 |
| $k_{PRE,Fe}$        | Precipitation rate constant for FePO <sub>4</sub>              | 1.0           | m <sup>3</sup> ·g <sup>-1</sup> Fe(OH) <sub>3</sub> ·d <sup>-1</sup> |
| $k_{PRE,Al}$        | Precipitation rate constant for AlPO <sub>4</sub>              | 1.37          | m <sup>3</sup> ·g <sup>-1</sup> Al(OH) <sub>3</sub> ·d <sup>-1</sup> |

**Table S6. *ADM1p* model state variables and default properties in QSDsan.** Omitted in this list are  $S_K$ ,  $S_{Mg}$ ,  $S_{Ca}$ ,  $X_{CaCO_3}$ ,  $X_{struv}$ ,  $X_{newb}$ ,  $X_{ACP}$ ,  $X_{MgCO_3}$ ,  $X_{AlOH}$ ,  $X_{AlPO_4}$ ,  $X_{FeOH}$ ,  $X_{FePO_4}$ ,  $S_{Na}$ , and  $S_{Cl}$ , which are identical to the ones in *mASM2d* (Table S3). All default elemental compositions are consistent with assumptions in [3].

|                       | Description                                                                        | Measured As | $i_{COD}$ | $i_C$  | $i_N$   | $i_P$   | $i_{mass}$ |
|-----------------------|------------------------------------------------------------------------------------|-------------|-----------|--------|---------|---------|------------|
| g·(g “measured-as”)⁻¹ |                                                                                    |             |           |        |         |         |            |
| $S_{su}$              | Monosaccharides                                                                    | COD         | 1         | 0.375  | 0       | 0       | 0.938      |
| $S_{aa}$              | Amino acids                                                                        | COD         | 1         | 0.369  | 0.11065 | 0       | 0.738      |
| $S_{fa}$              | Long-chain fatty acids (LCFAs)                                                     | COD         | 1         | 0.257  | 0       | 0       | 0.348      |
| $S_{va}$              | Valerate                                                                           | COD         | 1         | 0.289  | 0       | 0       | 0.491      |
| $S_{bu}$              | Butyrate                                                                           | COD         | 1         | 0.3009 | 0       | 0       | 0.544      |
| $S_{pro}$             | Propionate                                                                         | COD         | 1         | 0.322  | 0       | 0       | 0.652      |
| $S_{ac}$              | Acetate                                                                            | COD         | 1         | 0.375  | 0       | 0       | 0.923      |
| $S_{h2}$              | Dissolved hydrogen gas                                                             | COD         | 1         | 0      | 0       | 0       | 0.126      |
| $S_{ch4}$             | Dissolved methane gas                                                              | COD         | 1         | 0.188  | 0       | 0       | 0.251      |
| $S_{IC}$              | Total inorganic C in forms of CO <sub>2</sub>                                      | C           | 0         | 1      | 0       | 0       | 3.664      |
| $S_{IN}$              | Inorganic N in forms of NH <sub>4</sub> <sup>+</sup>                               | N           | 0         | 0      | 1       | 0       | 1.216      |
| $S_{IP}$              | Inorganic P in forms of orthophosphate                                             | P           | 0         | 0      | 0       | 1       | 3.099      |
| $S_I$                 | Soluble inert organic materials                                                    | COD         | 1         | 0.362  | 0.06003 | 0.00649 | 0.75       |
| $X_{ch}$              | Carbohydrates                                                                      | COD         | 1         | 0.375  | 0       | 0       | 0.868      |
| $X_{pr}$              | Proteins                                                                           | COD         | 1         | 0.369  | 0.11065 | 0       | 0.738      |
| $X_{li}$              | Lipids                                                                             | P           | 1         | 0.263  | 0       | 0.01066 | 0.348      |
| $X_{su}$              | Sugar degraders                                                                    | COD         | 1         | 0.366  | 0.08615 | 0.02154 | 0.9        |
| $X_{aa}$              | Amino acid degraders                                                               | COD         | 1         | 0.366  | 0.08615 | 0.02154 | 0.9        |
| $X_{fa}$              | LCFA degraders                                                                     | COD         | 1         | 0.366  | 0.08615 | 0.02154 | 0.9        |
| $X_{c4}$              | Valerate and butyrate degraders                                                    | COD         | 1         | 0.366  | 0.08615 | 0.02154 | 0.9        |
| $X_{pro}$             | Propionate degraders                                                               | COD         | 1         | 0.366  | 0.08615 | 0.02154 | 0.9        |
| $X_{ac}$              | Acetate degraders                                                                  | COD         | 1         | 0.366  | 0.08615 | 0.02154 | 0.9        |
| $X_{h2}$              | Hydrogen degraders                                                                 | COD         | 1         | 0.366  | 0.08615 | 0.02154 | 0.9        |
| $X_I$                 | Particulate inert organic materials                                                | COD         | 1         | 0.362  | 0.06003 | 0.00649 | 0.75       |
| $X_{PHA}$             | Poly-β-hydroxyalkanoates                                                           | COD         | 1         | 0.300  | 0       | 0       | 0.55       |
| $X_{PP}$              | Polyphosphate (K <sub>0.33</sub> Mg <sub>0.33</sub> PO <sub>3</sub> ) <sub>n</sub> | P           | 0         | 0      | 0       | 1       | 3.225      |
| $X_{PAO}$             | Phosphorus-accumulating organisms                                                  | COD         | 1         | 0.366  | 0.08615 | 0.02154 | 0.9        |

**Table S7. Stoichiometries of ADM1 biological processes in ADM1p.**  $i_C$ ,  $i_N$ , and  $i_P$  data from **Table S6** are used to solve for unknown stoichiometric coefficients “?” in each process based on mass conservations of carbon, nitrogen, and phosphorus, respectively.  $f_B^A$  [-] indicates the fraction of product  $B$  from the degradation of substrate  $A$ .

|                     | $S_{su}$        | $S_{aa}$ | $S_{fa}$      | $S_{va}$                | $S_{bu}$                | $S_{pro}$                | $S_{ac}$                 | $S_{h2}$                 | $S_{ch4}$  | $S_{IC}$ | $S_{IN}$ | $S_{IP}$ | $S_I$         | $X_{ch}$      | $X_{pr}$      | $X_{li}$      | $X_{su}$ | $X_{aa}$ | $X_{fa}$ | $X_{c4}$ | $X_{pro}$ | $X_{ac}$ | $X_{h2}$ | $X_I$         |
|---------------------|-----------------|----------|---------------|-------------------------|-------------------------|--------------------------|--------------------------|--------------------------|------------|----------|----------|----------|---------------|---------------|---------------|---------------|----------|----------|----------|----------|-----------|----------|----------|---------------|
| $X_{ch}$ hydrolysis | 1               |          |               |                         |                         |                          |                          |                          |            | ?        | ?        | ?        |               | -1            |               |               |          |          |          |          |           |          |          |               |
| $X_{pr}$ hydrolysis |                 | 1        |               |                         |                         |                          |                          |                          |            | ?        | ?        | ?        |               |               | -1            |               |          |          |          |          |           |          |          |               |
| $X_{li}$ hydrolysis | $1-f_{fa}^{li}$ |          | $f_{fa}^{li}$ |                         |                         |                          |                          |                          |            | ?        | ?        | ?        |               |               |               | -1            |          |          |          |          |           |          |          |               |
| $S_{su}$ uptake     | -1              |          |               |                         | $f_{bu}^{su}(1-Y_{su})$ | $f_{pro}^{su}(1-Y_{su})$ | $f_{ac}^{su}(1-Y_{su})$  | $f_{h2}^{su}(1-Y_{su})$  |            | ?        | ?        | ?        |               |               |               |               | $Y_{su}$ |          |          |          |           |          |          |               |
| $S_{aa}$ uptake     |                 | -1       |               | $f_{va}^{aa}(1-Y_{aa})$ | $f_{bu}^{aa}(1-Y_{aa})$ | $f_{pro}^{aa}(1-Y_{aa})$ | $f_{ac}^{aa}(1-Y_{aa})$  | $f_{h2}^{aa}(1-Y_{aa})$  |            | ?        | ?        | ?        |               |               |               |               |          | $Y_{aa}$ |          |          |           |          |          |               |
| $S_{fa}$ uptake     |                 |          | -1            |                         |                         |                          | $f_{ac}^{fa}(1-Y_{fa})$  | $f_{h2}^{fa}(1-Y_{fa})$  |            | ?        | ?        | ?        |               |               |               |               |          |          | $Y_{fa}$ |          |           |          |          |               |
| $S_{va}$ uptake     |                 |          |               | -1                      |                         | $f_{pro}^{va}(1-Y_{c4})$ | $f_{ac}^{va}(1-Y_{c4})$  | $f_{h2}^{va}(1-Y_{c4})$  |            | ?        | ?        | ?        |               |               |               |               |          |          |          | $Y_{c4}$ |           |          |          |               |
| $S_{bu}$ uptake     |                 |          |               |                         | -1                      |                          | $f_{ac}^{bu}(1-Y_{c4})$  | $f_{h2}^{bu}(1-Y_{c4})$  |            | ?        | ?        | ?        |               |               |               |               |          |          |          | $Y_{c4}$ |           |          |          |               |
| $S_{pro}$ uptake    |                 |          |               |                         |                         | -1                       | $f_{ac}^{pro}(1-Y_{c4})$ | $f_{h2}^{pro}(1-Y_{c4})$ |            | ?        | ?        | ?        |               |               |               |               |          |          |          |          | $Y_{pro}$ |          |          |               |
| $S_{ac}$ uptake     |                 |          |               |                         |                         |                          | -1                       |                          | $1-Y_{ac}$ | ?        | ?        | ?        |               |               |               |               |          |          |          |          |           | $Y_{ac}$ |          |               |
| $S_{h2}$ uptake     |                 |          |               |                         |                         |                          |                          | -1                       | $1-Y_{h2}$ | ?        | ?        | ?        |               |               |               |               |          |          |          |          |           |          | $Y_{h2}$ |               |
| $X_{su}$ decay      |                 |          |               |                         |                         |                          |                          |                          |            | ?        | ?        | ?        | $f_{sl}^{xb}$ | $f_{ch}^{xb}$ | $f_{pr}^{xb}$ | $f_{li}^{xb}$ | -1       |          |          |          |           |          |          | $f_{xl}^{xb}$ |
| $X_{aa}$ decay      |                 |          |               |                         |                         |                          |                          |                          |            | ?        | ?        | ?        | $f_{sl}^{xb}$ | $f_{ch}^{xb}$ | $f_{pr}^{xb}$ | $f_{li}^{xb}$ |          | -1       |          |          |           |          |          | $f_{xl}^{xb}$ |
| $X_{fa}$ decay      |                 |          |               |                         |                         |                          |                          |                          |            | ?        | ?        | ?        | $f_{sl}^{xb}$ | $f_{ch}^{xb}$ | $f_{pr}^{xb}$ | $f_{li}^{xb}$ |          |          | -1       |          |           |          |          | $f_{xl}^{xb}$ |
| $X_{c4}$ decay      |                 |          |               |                         |                         |                          |                          |                          |            | ?        | ?        | ?        | $f_{sl}^{xb}$ | $f_{ch}^{xb}$ | $f_{pr}^{xb}$ | $f_{li}^{xb}$ |          |          |          | -1       |           |          |          | $f_{xl}^{xb}$ |
| $X_{pro}$ decay     |                 |          |               |                         |                         |                          |                          |                          |            | ?        | ?        | ?        | $f_{sl}^{xb}$ | $f_{ch}^{xb}$ | $f_{pr}^{xb}$ | $f_{li}^{xb}$ |          |          |          |          | -1        |          |          | $f_{xl}^{xb}$ |
| $X_{ac}$ decay      |                 |          |               |                         |                         |                          |                          |                          |            | ?        | ?        | ?        | $f_{sl}^{xb}$ | $f_{ch}^{xb}$ | $f_{pr}^{xb}$ | $f_{li}^{xb}$ |          |          |          |          |           | -1       |          | $f_{xl}^{xb}$ |
| $X_{h2}$ decay      |                 |          |               |                         |                         |                          |                          |                          |            | ?        | ?        | ?        | $f_{sl}^{xb}$ | $f_{ch}^{xb}$ | $f_{pr}^{xb}$ | $f_{li}^{xb}$ |          |          |          |          |           |          | -1       | $f_{xl}^{xb}$ |

**Table S8. Stoichiometries and kinetic rate expressions of extended processes in ADM1p [5].** Unknown stoichiometric coefficients “?” in each process are determined by mass conservations of carbon, nitrogen, and phosphorus.

|                                | $S_{va}$       | $S_{bu}$       | $S_{pro}$       | $S_{ac}$       | $S_{IC}$ | $S_{IN}$ | $S_{IP}$ | $S_I$         | $X_{ch}$      | $X_{pr}$      | $X_{li}$      | $X_I$         | $X_{PHA}$  | $X_{PP}$ | $X_{PAO}$ | $S_K$                   | $S_{Mg}$                 | Kinetic rate expression                                                                                                                                                                                                          |  |
|--------------------------------|----------------|----------------|-----------------|----------------|----------|----------|----------|---------------|---------------|---------------|---------------|---------------|------------|----------|-----------|-------------------------|--------------------------|----------------------------------------------------------------------------------------------------------------------------------------------------------------------------------------------------------------------------------|--|
| $S_{va}$ storage in $X_{PHA}$  | -1             |                |                 |                | ?        | ?        | ?        |               |               |               |               | 1             | $-Y_{PO4}$ |          |           | $Y_{PO4} \cdot K_{XPP}$ | $Y_{PO4} \cdot Mg_{XPP}$ | $q_{PHA} \cdot \frac{S_{VFA,i}}{K_A + S_{VFA,i}} \cdot \frac{X_{PP}}{X_{PAO} \cdot K_{PP} + \frac{X_{PP}}{X_{PAO}}} \cdot X_{PAO} \cdot \frac{S_{VFA,i}}{\sum_i S_{VFA,i}},$ $S_{VFA,i} \in \{S_{va}, S_{bu}, S_{pro}, S_{ac}\}$ |  |
| $S_{bu}$ storage in $X_{PHA}$  |                | -1             |                 |                | ?        | ?        | ?        |               |               |               |               | 1             | $-Y_{PO4}$ |          |           | $Y_{PO4} \cdot K_{XPP}$ | $Y_{PO4} \cdot Mg_{XPP}$ |                                                                                                                                                                                                                                  |  |
| $S_{pro}$ storage in $X_{PHA}$ |                |                | -1              |                | ?        | ?        | ?        |               |               |               |               | 1             | $-Y_{PO4}$ |          |           | $Y_{PO4} \cdot K_{XPP}$ | $Y_{PO4} \cdot Mg_{XPP}$ |                                                                                                                                                                                                                                  |  |
| $S_{ac}$ storage in $X_{PHA}$  |                |                |                 | -1             | ?        | ?        | ?        |               |               |               |               | 1             | $-Y_{PO4}$ |          |           | $Y_{PO4} \cdot K_{XPP}$ | $Y_{PO4} \cdot Mg_{XPP}$ |                                                                                                                                                                                                                                  |  |
| $X_{PAO}$ lysis                |                |                |                 |                | ?        | ?        | ?        | $f_{sl}^{xb}$ | $f_{ch}^{xb}$ | $f_{pr}^{xb}$ | $f_{li}^{xb}$ | $f_{xl}^{xb}$ |            |          | -1        |                         |                          | $b_{PAO}X_{PAO}$                                                                                                                                                                                                                 |  |
| $X_{PP}$ lysis                 |                |                |                 |                | ?        | ?        | ?        |               |               |               |               |               |            | -1       |           | $K_{XPP}$               | $Mg_{XPP}$               | $b_{PP}X_{PP}$                                                                                                                                                                                                                   |  |
| $X_{PHA}$ lysis                | $f_{va}^{PHA}$ | $f_{bu}^{PHA}$ | $f_{pro}^{PHA}$ | $f_{ac}^{PHA}$ | ?        | ?        | ?        |               |               |               |               |               | -1         |          |           |                         |                          | $b_{PHA}X_{PHA}$                                                                                                                                                                                                                 |  |



**Table S9. New stoichiometric and kinetic parameters in *ADM1p*.** All default values are taken from [5]. Typical values at 35°C for kinetic parameters in the original ADM1 [6] are taken as default values in *ADM1p*.

| Symbol          | Description                                                        | Default value        | Unit                                             |
|-----------------|--------------------------------------------------------------------|----------------------|--------------------------------------------------|
| $f_{sl}^{xb}$   | Fraction of soluble inerts from biomass                            | 0                    | -                                                |
| $f_{ch}^{xb}$   | Fraction of carbohydrates from biomass                             | 0.275                | -                                                |
| $f_{pr}^{xb}$   | Fraction of proteins from biomass                                  | 0.275                | -                                                |
| $f_{li}^{xb}$   | Fraction of lipids from biomass                                    | 0.350                | -                                                |
| $f_{xl}^{xb}$   | Fraction of particulate inerts from biomass                        | 0.1                  | -                                                |
| $K_{S,IP}$      | Half saturation coefficient of $S_{IP}$ as a nutrient <sup>†</sup> | $6.2 \times 10^{-4}$ | kg P·m <sup>-3</sup>                             |
| $f_{va}^{PHA}$  | Yield of valerate on PHA                                           | 0.10                 | kg COD·(kg COD) <sup>-1</sup>                    |
| $f_{bu}^{PHA}$  | Yield of butyrate on PHA                                           | 0.10                 | kg COD·(kg COD) <sup>-1</sup>                    |
| $f_{pro}^{PHA}$ | Yield of propionate on PHA                                         | 0.40                 | kg COD·(kg COD) <sup>-1</sup>                    |
| $f_{ac}^{PHA}$  | Yield of acetate on PHA                                            | 0.40                 | kg COD·(kg COD) <sup>-1</sup>                    |
| $Y_{PO4}$       | PP requirement per PHA stored                                      | 0.40                 | kg P·(kg COD) <sup>-1</sup>                      |
| $K_{XPP}$       | Potassium content of PP                                            | 0.417                | kg K·(kg $X_{PP}$ -P) <sup>-1</sup>              |
| $Mg_{XPP}$      | Magnesium content of PP                                            | 0.259                | kg Mg·(kg $X_{PP}$ -P) <sup>-1</sup>             |
| $q_{PHA}$       | PHA storage rate constant                                          | 3.0                  | kg COD·(kg COD) <sup>-1</sup> ·d <sup>-1</sup>   |
| $K_A$           | Saturation coefficient for VFAs                                    | 0.004                | kg COD·m <sup>-3</sup>                           |
| $K_{PP}$        | Saturation coefficient for PP                                      | 0.01                 | kg $X_{PP}$ -P·(kg $X_{PAO}$ -COD) <sup>-1</sup> |
| $b_{PAO}$       | Lysis rate of PAOs                                                 | 0.20                 | d <sup>-1</sup>                                  |
| $b_{PP}$        | Lysis rate of PP                                                   | 0.20                 | d <sup>-1</sup>                                  |
| $b_{PHA}$       | Lysis rate of PHA                                                  | 0.20                 | d <sup>-1</sup>                                  |

<sup>†</sup> An inhibition term,  $S_{IP}/(K_{S,IP} + S_{IP})$ , is applied to the kinetic rate expressions of acidogenesis, acetogenesis, and methanogenesis processes

### ***mASM2d* ↔ *ADM1p* interface models**

Interface models *mASM2dtoAMD1p* and *AMD1ptomASM2d* are implemented in QSDsan to perform state variable conversion from *mASM2d* to *ADM1p* and reverse. Both implementations generally follow model A1 from [5] with minor modifications to improve the numerical stability. In summary, *mASM2dtoAMD1p* performs eight steps:

- 1) Instantaneous depletion of  $S_{O_2}$  for aerobic heterotrophic growth, using  $S_A$ , then  $S_F$ , and lastly  $X_S$  as substrates, following *mASM2d* stoichiometries. By default,  $S_F$  and  $X_S$  have identical compositions. If  $S_A$  and  $S_F$  combined is insufficient for complete consumption of  $S_{O_2}$ ,  $X_S$  is assumed to be hydrolyzed into  $S_F$  instantaneously to allow  $S_{O_2}$  depletion.
- 2) Instantaneous depletion of  $S_{NO_3}$  for denitrification, using  $S_A$ , then  $S_F$ , and lastly  $X_S$  as substrates.
- 3) Conversion of any  $S_F$  left to  $S_{aa}$  and  $S_{su}$ . COD and N are conserved, with  $S_{NH_4}$  serving as a potential source or sink of N.
- 4) Instantaneous decay of  $X_H$  and  $X_{AUT}$  to form  $S_I$ ,  $X_{ch}$ ,  $X_{pr}$ ,  $X_{li}$ , and  $X_I$  according to *ADM1p* biomass decay stoichiometry. By default, all biomass components in *mASM2d* and *ADM1p* have identical compositions.
- 5) Conversion of any  $X_S$  left to  $X_{pr}$ ,  $X_{ch}$ , and  $X_{li}$ . COD, C, N, and P are conserved using  $S_{IC}$ ,  $S_{NH_4}$ , and  $S_{PO_4}$  as sources or sinks of corresponding elements when needed.
- 6) Direct mappings from  $S_A$ ,  $S_{IC}$ ,  $S_{NH_4}$ , and  $S_{PO_4}$  to  $S_{ac}$ ,  $S_{IC}$ ,  $S_{IN}$ , and  $S_{IP}$ , respectively.
- 7) Immediate mappings of  $S_I$ ,  $X_I$ ,  $X_{PHA}$ ,  $X_{PP}$ ,  $X_{PAO}$ ,  $S_K$ ,  $S_{Mg}$ ,  $S_{Ca}$ ,  $X_{CaCO_3}$ ,  $X_{struv}$ ,  $X_{newb}$ ,  $X_{ACP}$ ,  $X_{MgCO_3}$ ,  $X_{AlOH}$ ,  $X_{AlPO_4}$ ,  $X_{FeOH}$ ,  $X_{FePO_4}$ ,  $S_{Na}$ , and  $S_{Cl}$  between two models.
- 8) Resolve any negative value in  $S_{IC}$ ,  $S_{IN}$ , or  $S_{IP}$  by dissolving relevant minerals proportionally to their relative abundances.

Similarly, *AMD1ptomASM2d* has 8 steps:

- 1) Instantaneous decay of  $X_{su}$ ,  $X_{aa}$ ,  $X_{fa}$ ,  $X_{C4}$ ,  $X_{pro}$ ,  $X_{ac}$ ,  $X_{h2}$ ,  $X_{PAO}$ ,  $X_{PHA}$ , and  $X_{PP}$  according to *ADM1p* stoichiometries.
- 2) Instantaneous stripping of  $S_{h2}$  and  $S_{ch4}$ .
- 3) Conversion of  $X_{pr}$ ,  $X_{ch}$ , and  $X_{li}$  to  $X_S$  using  $S_{IC}$ ,  $S_{IN}$ , and  $S_{IP}$  as sources or sinks of C, N, and P, respectively, when needed.
- 4) Conversion of  $S_{aa}$ ,  $S_{fa}$ , and  $S_{su}$  to  $S_F$  using  $S_{IC}$ ,  $S_{IN}$ , and  $S_{IP}$  as sources or sinks of C, N, and P, respectively, when needed.
- 5) Conversion of  $S_{ac}$ ,  $S_{pro}$ ,  $S_{bu}$ , and  $S_{va}$  to  $S_A$  using  $S_{IC}$  for C conservation.
- 6) Direct mappings from  $S_{IC}$ ,  $S_{IN}$ , and  $S_{IP}$  to  $S_{IC}$ ,  $S_{NH_4}$ , and  $S_{PO_4}$ , respectively.
- 7) Immediate mappings of  $S_I$ ,  $X_I$ ,  $X_{PHA}$ ,  $X_{PP}$ ,  $X_{PAO}$ ,  $S_K$ ,  $S_{Mg}$ ,  $S_{Ca}$ ,  $X_{CaCO_3}$ ,  $X_{struv}$ ,  $X_{newb}$ ,  $X_{ACP}$ ,  $X_{MgCO_3}$ ,  $X_{AlOH}$ ,  $X_{AlPO_4}$ ,  $X_{FeOH}$ ,  $X_{FePO_4}$ ,  $S_{Na}$ , and  $S_{Cl}$  between two models.
- 8) Resolve any negative value in  $S_{IC}$ ,  $S_{NH_4}$ , or  $S_{PO_4}$  by dissolving minerals proportionally to their relative abundances.

**Table S10. Comparative summary of processes included in different models.**

|                                            | ASM2d  | <i>mASM2d</i>         | ADM1 | <i>ADM1p</i>                                                                  | mantis3                                                                       | Sumo2                                                              | ASDM                     |
|--------------------------------------------|--------|-----------------------|------|-------------------------------------------------------------------------------|-------------------------------------------------------------------------------|--------------------------------------------------------------------|--------------------------|
| Simulation platform                        | all    | QSDsan                | all  | QSDsan                                                                        | GPS-X™                                                                        | SUMO                                                               | BioWin                   |
| Hydrolysis                                 | √      | √                     | √    | √                                                                             | √                                                                             | √                                                                  | √                        |
| Fermentation                               | √      | √                     | √    | √                                                                             | √                                                                             | √                                                                  | √                        |
| Anoxic methylotrophs                       |        |                       |      |                                                                               | √                                                                             | √                                                                  | √                        |
| Algal photosynthesis                       |        |                       |      |                                                                               |                                                                               | √                                                                  |                          |
| Nitrification/denitrification              | 1-step | 1-step                |      |                                                                               | 2-step                                                                        | 2-step                                                             | 2-step                   |
| Anammox                                    |        |                       |      |                                                                               | √                                                                             | √                                                                  | √                        |
| N <sub>2</sub> O gas production            |        |                       |      |                                                                               | √                                                                             |                                                                    | √                        |
| PAO                                        | √      | √                     |      | √                                                                             | √                                                                             | √                                                                  | √                        |
| GAO                                        |        |                       |      |                                                                               |                                                                               | √                                                                  |                          |
| Methanogenesis                             |        |                       | √    | √                                                                             | √                                                                             | √                                                                  | √                        |
| P precipitation with metal hydroxides      | √      | √                     |      | √                                                                             | √                                                                             | √                                                                  | √                        |
| Mineral precipitation                      |        | Optional <sup>†</sup> |      | CaCO <sub>3</sub> ,<br>ACP,<br>MgCO <sub>3</sub> ,<br>struvite,<br>newberyite | CaCO <sub>3</sub> ,<br>ACP,<br>MgCO <sub>3</sub> ,<br>struvite,<br>newberyite | CaCO <sub>3</sub> ,<br>ACP,<br>brushite,<br>struvite,<br>vivianite | HDP,<br>HAP,<br>struvite |
| Alkalinity                                 | √      | √                     |      |                                                                               | √                                                                             |                                                                    | √                        |
| Alkalinity inhibition on biological growth | √      |                       |      |                                                                               |                                                                               |                                                                    |                          |
| Temperature dependency                     |        |                       | √    | √                                                                             | √                                                                             | √                                                                  | √                        |
| pH                                         |        | √                     | √    | √                                                                             | √                                                                             | √                                                                  | √                        |
| pH inhibition                              |        |                       | √    | √                                                                             |                                                                               |                                                                    | √                        |
| Liquid-gas transfer                        |        | √                     | √    | √                                                                             | √                                                                             | √                                                                  | √                        |

<sup>†</sup> Mineral precipitation is by default enabled in the aerobic digesters across benchmark configurations, using the kinetic expressions by Kazadi Mbamba *et al.* [7,8].

**Table S11. Default design and operational settings for benchmark configurations.**

*See attached Excel file.*

**Table S12. Corresponding alphanumeric coding systems of WRRF configurations.** DOE liquid code uses a \* prefix to indicate the presence of primary treatment and a “-p” suffix for chemical phosphorus removal in a configuration. Certain liquid treatment trains do not have a DOE code. WERF liquid code uses “-P” suffix for “prime” to indicate a variation on the mainstream process, unrelated to the standalone “P” liquid treatment train.

|             | <b>WERF code</b><br>(Tarallo et al. [2] and <b>this study</b> ) | <b>DOE code</b><br>(El Abbadi et al. [9]) |
|-------------|-----------------------------------------------------------------|-------------------------------------------|
| Liquid code | A                                                               |                                           |
|             | B                                                               | *A                                        |
|             | C                                                               | A                                         |
|             | O                                                               | *B                                        |
|             | D                                                               | *C                                        |
|             | E                                                               | E                                         |
|             | E-P                                                             | *E                                        |
|             | F                                                               | *E                                        |
|             | P                                                               |                                           |
|             | G                                                               | *G                                        |
|             | H                                                               | *G-p                                      |
|             | I                                                               | F                                         |
|             | N                                                               | D or *D                                   |
|             | N-P                                                             | D or *D                                   |
|             | L                                                               |                                           |
|             | M                                                               |                                           |
| Solid code  | 1                                                               | 1                                         |
|             | 1E                                                              | 1e                                        |
|             | 2                                                               | 3                                         |
|             | 3                                                               | 4                                         |
|             | 4                                                               | 2                                         |
|             | 5                                                               | 5                                         |
|             | 6                                                               | 6                                         |

### DiffusedAeration algorithm

$k_L a$  = Oxygen mass transfer coefficient at field condition [ $d^{-1}$ ]

$$k_L a = \alpha \cdot F \cdot \theta^{T_{water}-T_{20}} \cdot k_L a_{20}$$

$T_{water}$  = water temperature [K]

$\alpha$  = wastewater correction factor, unitless

$F$  = diffuser fouling factor, unitless

$\theta$  = temperature correction factor, unitless

$k_L a_{20}$  = Oxygen mass transfer coefficient [ $d^{-1}$ ] at standard condition (20°C, clean water, new diffuser)

$$k_L a_{20} = \frac{SOTR}{V \cdot \delta \cdot DO_{sat,20}}$$

$V$  = reactor volume [ $m^3$ ]

$DO_{sat,20}$  = surface DO saturation concentration [ $mg \cdot L^{-1}$ ] at standard condition (20°C, 1 atm, clean water)

$\delta$  = depth correction factor, unitless

$$\delta(d_{sub}) = \begin{cases} 1 + 0.03858 \times d_{sub} & \text{fine pore} \\ 0.99 + 0.0291 \times d_{sub} & \text{coarse bubble} \end{cases}$$

$d_{sub}$  = diffuser submergence depth [m]

$SOTR$  = standard oxygen transfer rate [ $g \cdot d^{-1}$ ]

$$SOTR = \frac{Q_{air}}{f} \cdot CF_1 \cdot SOTE$$

$Q_{air}$  = air flowrate at field condition [ $m^3 \cdot d^{-1}$ ]

$CF_1$  = oxygen gas content in standard air [ $g \text{ O}_2 \cdot m^{-3} \text{ air}$ ]

$SOTE$  = standard oxygen transfer efficiency, unitless

$f$  = air flowrate correction factor, unitless

$$f = \frac{T_{air}}{T_{20}} \cdot \exp\left(\frac{M_{air} \cdot g \cdot h}{R \cdot T_{air} \cdot 10^3}\right)$$

$T_{air}$  = air temperature [K]

$T_{20} = 293.15$  [K], i.e., 20°C

$M_{air}$  = molecular weight of dry air [ $g \cdot mol^{-1}$ ]

$g$  = gravitational acceleration [ $m \cdot s^{-2}$ ]

$R$  = universal gas constant [ $J \cdot mol^{-1} \cdot K^{-1}$ ]

$h$  = diffuser elevation [m]

$$\therefore k_L a = \frac{\alpha F \theta^{T_{water}-T_{20}} \cdot SOTE \cdot CF_1}{\frac{T_{air}}{T_{20}} \cdot \exp\left(\frac{M_{air} g h}{R T_{air} \cdot 10^3}\right) \cdot \delta(d_{sub}) \cdot DO_{sat,20}} \cdot \frac{Q_{air}}{V}$$

where  $g$ ,  $R$ ,  $T_{20}$  are constants,  $T_{air}$ ,  $T_{water}$ ,  $V$ ,  $h$ ,  $d_{sub}$  are system-specific model inputs, and  $\alpha$ ,  $F$ ,  $\theta$ ,  $SOTE$ ,  $M_{air}$ ,  $DO_{sat,20}$ ,  $CF_1$  are user-specified parameters.



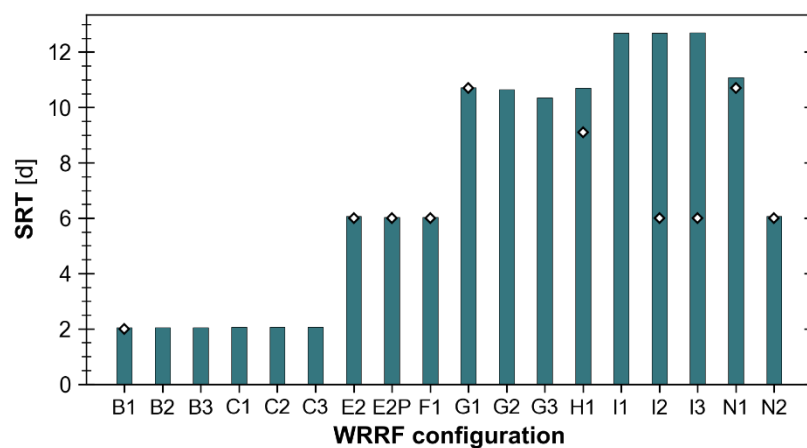

**Figure S2. Steady-state SRTs of secondary treatment across benchmark configurations.** Vertical bars represent simulations with QSDsan (this study). Diamond markers represent simulations with the original GPS-X models by Tarallo *et al.* [2].

## References

1. Metcalf & Eddy, Inc. Wastewater Engineering: Treatment and Resource Recovery [Internet]. 5th ed. NY, UNITED STATES: McGraw-Hill Higher Education; 2013 [cited 2025 Feb 23]. Available from: <http://ebookcentral.proquest.com/lib/uiuc/detail.action?docID=5662641>
2. Tarallo S, Shaw A, Kohl P, Eschborn R. A Guide to Net-Zero Energy Solutions for Water Resource Recovery Facilities [Internet]. The Water Environment Research Foundation; 2015 Aug [cited 2024 Oct 29]. Available from: <https://iwaponline.com/ebooks/book/293/>
3. Solon K, Flores-Alsina X, Kazadi Mbamba C, Ikumi D, Volcke EIP, Vaneeckhaute C, et al. Plant-wide modelling of phosphorus transformations in wastewater treatment systems: Impacts of control and operational strategies. *Water Res.* 2017 Apr;113:97–110.
4. Henze M, Gujer W, Mino T, Matsuo T, Wentzel MC, Marais G v. R, et al. Activated Sludge Model No.2d, ASM2D. *Water Sci Technol.* 1999 Jan 1;39(1):165–82.
5. Flores-Alsina X, Solon K, Kazadi Mbamba C, Tait S, Gernaey KV, Jeppsson U, et al. Modelling phosphorus (P), sulfur (S) and iron (Fe) interactions for dynamic simulations of anaerobic digestion processes. *Water Res.* 2016 May 15;95:370–82.
6. Batstone DJ, Keller J, Angelidaki I, Kalyuzhnyi SV, Pavlostathis SG, Rozzi A, et al. The IWA Anaerobic Digestion Model No 1 (ADM1). *Water Sci Technol.* 2002 May 1;45(10):65–73.
7. Kazadi Mbamba C, Batstone DJ, Flores-Alsina X, Tait S. A generalised chemical precipitation modelling approach in wastewater treatment applied to calcite. *Water Res.* 2015 Jan 1;68:342–53.
8. Kazadi Mbamba C, Tait S, Flores-Alsina X, Batstone DJ. A systematic study of multiple minerals precipitation modelling in wastewater treatment. *Water Res.* 2015 Nov 15;85:359–70.
9. El Abbadi SH, Feng J, Hodson AR, Amouamouha M, Busse MM, Polcuch C, et al. Benchmarking Greenhouse Gas Emissions from U.S. Wastewater Treatment for Targeted Reduction. *Nature Water.* *In press.*
