# Supplementary material for: An agile benchmarking framework for wastewater resource recovery technologies
Source: Research Square preprint supplement (doi:10.21203/rs.3.rs-7874013/v1), 2025-10-23
Supplement: Supplementary file 1 [file cc0637704388e0eddff0f74c.xlsx]

## Sheet: Sheet1
	Treatment Target	rBOD						NIT			BNR
	Configuration (WERF code)	B1	B2	B3	C1	C2	C3	E2	E2P	F1	G1	G2	G3	H1	I1	I2	I3	N1	N2
Influent	Flow rate [MGD]	10
	Coagulant dosage [gAl/m3]	NA												6.6	NA
Primary Clarifier	Underflow rate [MGD]	0.066			NA			NA	0.074	0.074	0.074			0.074	NA			0.074	NA
	Solids removal efficiency [-]	0.6							0.6	0.6	0.6			0.6				0.6
Primary Sludge Thickening	Thickened sludge flowrate [MGD]	0.023							0.023	0.026	0.026			0.026				NA
	Solids removal efficiency [-]	0.9							0.9	0.9	0.9			0.9
Activated Sludge Reactors	Zone 1 volume [MG]	0.166667			0.266667			0.8	0.4	0.4	0.0658			0.4209	0.63	0.63	0.33	0.3132
	Zone 2 volume [MG]	0.166667			0.266667			0.8	0.4	0.4	0.611			0.4209	1.5	1.5	1.5	0.4698
	Zone 3 volume [MG]	0.166667			0.266667			0.8	0.4	0.4	0.6956			1.14924	2	2	2.1	0.6264
	Zone 4 volume [MG]	0.166667			0.266667			0.8	0.4	0.4	0.6956			1.14924	2	2	2.1	0.6264
	Zone 5 volume [MG]	0.166667			0.266667			0.8	0.4	0.4	1.316			0.4209	2.3	2.3	2.3	0.4698
	Zone 6 volume [MG]	0.166667			0.266667			0.8	0.4	0.4	1.316			0.09882	0.21	0.21	0.31	0.1044
	Zone 1 DO setpoint [mg/L]	2									0			0	0			0
	Zone 2 DO setpoint [mg/L]	2									0			0	0			0
	Zone 3 DO setpoint [mg/L]	2									0			2	2			3
	Zone 4 DO setpoint [mg/L]	2									0			2	2			3
	Zone 5 DO setpoint [mg/L]	2									2			0	0			0
	Zone 6 DO setpoint [mg/L]	2									2			2	2			2
	Primary effluent (or raw influent + reject water)	100% to zone 1									80% to zone 2, 20% to zone 3			100% to zone 1	100% to zone 1			100% to zone 1
	RAS	100% to zone 1									100% to zone 1			100% to zone 1	100% to zone 1			NA
	Internal recirculation #1	NA									40 MGD from zone 6 to zone 3			30 MGD from zone 4 to zone 1	30 MGD from zone 4 to zone 2			10 MGD from zone 2 to zone 1
	Internal recirculation #2	NA									NA			NA	NA			40 MGD from zome 4 to zone 2	20 MGD from zome 4 to zone 2
	Internal recirculation #3	NA									NA			NA	NA			40 MGD from zone 6 to zone 3
	External carbon	NA									100% to zone 1			100% to zone 1	NA			100% to zone 1
	Carbon dosage [kgCOD/hr]	NA									85	85	30	43	NA			250	200
Membrane Unit	Zone 6 sludge wasting [MGD]	NA																0.17	0.3
	Solids capture rate [-]																	0.9999
	Cleaning air flowrate [cfm]																	20000
Final Clarifier	Surface area [sqft]	17000																NA
	Height [ft]	12
	Feed point from bottom [ft]	7			5			5	5	7	7			7	5
	RAS flowrate [MGD]	6.7			6.7			6.7	6.7	6.7	4			4	6.7
	WAS flowrate [MGD]	0.2			0.32			0.33	0.163	0.163	0.135	0.136	0.14	0.1	0.2815
	Hindered zone settling parameter [m3/g TSS]	0.0004			0.0003			0.0003	0.0003	0.0004	0.0004			0.0004	0.0003
	Flocculant zone settling parameter [m3/g TSS]	0.0025			0.0052			0.0052	0.0052	0.1	0.1			0.1	0.0052
	Non-settleable fraction of TSS [-]	0.001			0.001			0.001	0.001	0.01	0.01			0.01	0.001
	Maximum nonsettleable solids [mgTSS/L]	20						8							20
WAS Thickening	Thickened sludge solids [%TS]	5																NA	5
	Solids removal efficiency [-]	0.95																	0.95
Co-Thickening	Thickened sludge solids [%TS]	NA																5	NA
	Solids removal efficiency [-]																	0.85
Anaerobic Digestion	Liquid phase volume [MG]	0.85	NA	NA	0.85	NA	NA	NA	NA	0.85	0.95	NA	NA	1.1	0.85	NA	NA	1.2	NA
	Headspace volume [MG]	0.085			0.085					0.085	0.117			0.11	0.085			0.12
	Biogas kLa [/d]	10			10					10	10			10	10			10
Aerobic Digestion	Digester volume [MG]	NA	3	NA	NA	3	NA	3	0.5	NA	NA	2.4	NA	NA	NA	2.4	NA	NA	2.4
	DO setpoint [mg/L]		1			1		1	1			1				1			1
Sludge Dewatering	Cake solids [%TS]	18	17	20	17			17	17	18	18	17	20	18	17			18	17
	Solids removal efficiency [-]	0.9
